# Supplementary material for: Clinical Validity, Understandability, and Actionability of Online Cardiovascular Disease Risk Calculators: Systematic Review
Source: PubMed Central journal article supplement (PMC5814602; doi:10.2196/jmir.8538), 2018-02-01
Supplement: jmir_v20i2e29_app1.pdf [file jmir_v20i2e29_app1.pdf]

## Multimedia Appendix 1: Risk Calculator Archive and PEMAT-P Scores

Table A: Web archive of included Cardiovascular Disease Risk Calculators

| ID | Web address                                                                                                                                                                                                                                                               | WebCite                                                                                 |
|----|---------------------------------------------------------------------------------------------------------------------------------------------------------------------------------------------------------------------------------------------------------------------------|-----------------------------------------------------------------------------------------|
| 1  | <a href="http://aricnews.net/riskcalc/html/rc1.html">http://aricnews.net/riskcalc/html/rc1.html</a>                                                                                                                                                                       | <a href="http://www.webcitation.org/6rB7aUByj">http://www.webcitation.org/6rB7aUByj</a> |
| 2  | <a href="http://chd.bestsciencemedicine.com/calc2.html">http://chd.bestsciencemedicine.com/calc2.html</a>                                                                                                                                                                 | <a href="http://www.webcitation.org/6rB8ql4nD">http://www.webcitation.org/6rB8ql4nD</a> |
| 3  | <a href="http://clincalc.com/cardiology/ascvd/pooledcohort.aspx">http://clincalc.com/cardiology/ascvd/pooledcohort.aspx</a>                                                                                                                                               | <a href="http://www.webcitation.org/6rB7l3O59">http://www.webcitation.org/6rB7l3O59</a> |
| 4  | <a href="http://cvrisk.mvm.ed.ac.uk/calculator/calc.asp">http://cvrisk.mvm.ed.ac.uk/calculator/calc.asp</a>                                                                                                                                                               | <a href="http://www.webcitation.org/6rB7gh6nt">http://www.webcitation.org/6rB7gh6nt</a> |
| 5  | <a href="http://healthtools.bodyandhealth.canada.com/health_tools.asp?t=82&amp;text_id=4720&amp;channel_id=2172&amp;relation_id=112942">http://healthtools.bodyandhealth.canada.com/health_tools.asp?t=82&amp;text_id=4720&amp;channel_id=2172&amp;relation_id=112942</a> | <a href="http://www.webcitation.org/6rB637EWc">http://www.webcitation.org/6rB637EWc</a> |
| 6  | <a href="http://patient.info/doctor/cardiovascular-risk-calculator">http://patient.info/doctor/cardiovascular-risk-calculator</a>                                                                                                                                         | <a href="http://www.webcitation.org/6rB9MTrC6">http://www.webcitation.org/6rB9MTrC6</a> |
| 7  | <a href="http://reference.medscape.com/calculator/aac-aha-cardiovascular-risk-ascvd">http://reference.medscape.com/calculator/aac-aha-cardiovascular-risk-ascvd</a>                                                                                                       | <a href="http://www.webcitation.org/6rB8vTIH2">http://www.webcitation.org/6rB8vTIH2</a> |
| 8  | <a href="http://reference.medscape.com/calculator/framingham-cardiovascular-disease-risk">http://reference.medscape.com/calculator/framingham-cardiovascular-disease-risk</a>                                                                                             | <a href="http://www.webcitation.org/6rB9UeaN4">http://www.webcitation.org/6rB9UeaN4</a> |
| 9  | <a href="http://reference.medscape.com/calculator/framingham-coronary-risk-cholesterol">http://reference.medscape.com/calculator/framingham-coronary-risk-cholesterol</a>                                                                                                 | <a href="http://www.webcitation.org/6rB7rcwN8">http://www.webcitation.org/6rB7rcwN8</a> |
| 10 | <a href="http://statindecisionaid.mayoclinic.org/index.php/statin/index">http://statindecisionaid.mayoclinic.org/index.php/statin/index</a>                                                                                                                               | <a href="http://www.webcitation.org/6rB7TxoW4">http://www.webcitation.org/6rB7TxoW4</a> |
| 11 | <a href="http://stroke.ucla.edu/stroke-risk-calculator">http://stroke.ucla.edu/stroke-risk-calculator</a>                                                                                                                                                                 | <a href="http://www.webcitation.org/6rB6yZjuM">http://www.webcitation.org/6rB6yZjuM</a> |
| 12 | <a href="http://strongheart.ouhsc.edu/CHDcalculator/calculator.html">http://strongheart.ouhsc.edu/CHDcalculator/calculator.html</a>                                                                                                                                       | <a href="http://www.webcitation.org/6rB9cqk6X">http://www.webcitation.org/6rB9cqk6X</a> |
| 13 | <a href="http://tools.acc.org/ASCVD-Risk-Estimator/">http://tools.acc.org/ASCVD-Risk-Estimator/</a>                                                                                                                                                                       | <a href="http://www.webcitation.org/6rB8TqNFr">http://www.webcitation.org/6rB8TqNFr</a> |
| 14 | <a href="http://tools.bigbeelabs.com/aha/tools/hbp/">http://tools.bigbeelabs.com/aha/tools/hbp/</a>                                                                                                                                                                       | <a href="http://www.webcitation.org/6rB5r8B4H">http://www.webcitation.org/6rB5r8B4H</a> |
| 15 | <a href="http://www.assign-score.com/estimate-the-risk/">http://www.assign-score.com/estimate-the-risk/</a>                                                                                                                                                               | <a href="http://www.webcitation.org/6rB9h3yHq">http://www.webcitation.org/6rB9h3yHq</a> |
| 16 | <a href="http://www.bhgp.co.uk/cardiocalc.asp">http://www.bhgp.co.uk/cardiocalc.asp</a>                                                                                                                                                                                   | <a href="http://www.webcitation.org/6rB9vfUrP">http://www.webcitation.org/6rB9vfUrP</a> |
| 17 | <a href="http://www.bshp.edu/Files/Baptist/Flash/StrokeRiskCalculator/index.htm">http://www.bshp.edu/Files/Baptist/Flash/StrokeRiskCalculator/index.htm</a>                                                                                                               | <a href="http://www.webcitation.org/6rB5wauRR">http://www.webcitation.org/6rB5wauRR</a> |
| 18 | <a href="http://www.cdc.gov/vitalsigns/cardiovascular-disease/heartage.html">http://www.cdc.gov/vitalsigns/cardiovascular-disease/heartage.html</a>                                                                                                                       | <a href="http://www.webcitation.org/6rB9znEPE">http://www.webcitation.org/6rB9znEPE</a> |
| 19 | <a href="http://www.cimedicalcenter.com/heart-attack-calculator-p126">http://www.cimedicalcenter.com/heart-attack-calculator-p126</a>                                                                                                                                     | <a href="http://www.webcitation.org/6rBA3ilNz">http://www.webcitation.org/6rBA3ilNz</a> |
| 20 | <a href="http://www.cvdcheck.org.au/">http://www.cvdcheck.org.au/</a>                                                                                                                                                                                                     | <a href="http://www.webcitation.org/6rBA9coEd">http://www.webcitation.org/6rBA9coEd</a> |
| 21 | <a href="http://www.cvriskcalculator.com/">http://www.cvriskcalculator.com/</a>                                                                                                                                                                                           | <a href="http://www.webcitation.org/6rB8ejEoB">http://www.webcitation.org/6rB8ejEoB</a> |
| 22 | <a href="http://www.framinghamheartstudy.org/risk-functions/cardiovascular-disease/10-year-risk.php#">http://www.framinghamheartstudy.org/risk-functions/cardiovascular-disease/10-year-risk.php#</a>                                                                     | <a href="http://www.webcitation.org/6rBAD0e2U">http://www.webcitation.org/6rBAD0e2U</a> |
| 23 | <a href="http://www.framinghamheartstudy.org/risk-functions/cardiovascular-disease/30-year-risk.php#">http://www.framinghamheartstudy.org/risk-functions/cardiovascular-disease/30-year-risk.php#</a>                                                                     | <a href="http://www.webcitation.org/6rBAHRMEZ">http://www.webcitation.org/6rBAHRMEZ</a> |
| 24 | <a href="http://www.globalrph.com/pooled.htm">http://www.globalrph.com/pooled.htm</a>                                                                                                                                                                                     | <a href="http://www.webcitation.org/6rB5kcQJV">http://www.webcitation.org/6rB5kcQJV</a> |
| 25 | <a href="http://www.heart.org/gglRisk/locale/en_US/index.html?gtype=health">http://www.heart.org/gglRisk/locale/en_US/index.html?gtype=health</a>                                                                                                                         | <a href="http://www.webcitation.org/6rB8jT1NQ">http://www.webcitation.org/6rB8jT1NQ</a> |
| 26 | <a href="http://www.knowyournumbers.co.nz/heart-age-forecast.aspx">http://www.knowyournumbers.co.nz/heart-age-forecast.aspx</a>                                                                                                                                           | <a href="http://www.webcitation.org/6rBAL6AtE">http://www.webcitation.org/6rBAL6AtE</a> |
| 27 | <a href="http://www.mayoclinic.org/heart-disease-risk/itt-20084942">http://www.mayoclinic.org/heart-disease-risk/itt-20084942</a>                                                                                                                                         | <a href="http://www.webcitation.org/6s0gr0XJU">http://www.webcitation.org/6s0gr0XJU</a> |
| 28 | <a href="http://www.mcw.edu/calculators/Coronary-Heart-Disease-Risk.htm">http://www.mcw.edu/calculators/Coronary-Heart-Disease-Risk.htm</a>                                                                                                                               | <a href="http://www.webcitation.org/6rBDxzJrb">http://www.webcitation.org/6rBDxzJrb</a> |
| 29 | <a href="http://www.mcw.edu/calculators/LDL-Cholesterol-Goal-Level.htm">http://www.mcw.edu/calculators/LDL-Cholesterol-Goal-Level.htm</a>                                                                                                                                 | <a href="http://www.webcitation.org/6rBE0lwwL">http://www.webcitation.org/6rBE0lwwL</a> |

30 <http://www.mdcalc.com/framingham-coronary-heart-disease-risk-score/>

31 <http://www.medcalc.com/heartrisk.html>

32 <http://www.medindia.net/patients/calculators/cardiackrisk.asp>

33 <http://www.medindia.net/patients/calculators/stroke-risk-calculator.asp>

34 <http://www.mountcarmelhealth.com/fast>

35 <http://www.mydr.com.au/tools/heart-disease-risk-test>

36 <http://www.mydr.com.au/tools/stroke-risk-test>

37 <http://www.ohsu.edu/xd/health/services/brain/getting-treatment/diagnosis/stroke/stroke-risk-assessment-test.cfm>

38 <http://www.premierhealth.com/Your-Wellness/Live-Well-Stay-Well/Know-Your-Risk/Heart-Risk-Assessment/>

39 <http://www.projectbiglife.ca/life/index.php?le=1&fhc=0&str=1>

40 <http://www.qintervention.org/>

41 <http://www.qstroke.org/>

42 <http://www.reynoldsriskscore.org/>

43 <http://www.riskscore.org.uk/>

44 <http://www.vizhealth.org/using/calculator/>

45 [http://www.womensheart.org/content/heartdisease/heart\\_disease\\_risk\\_quiz.asp](http://www.womensheart.org/content/heartdisease/heart_disease_risk_quiz.asp)

46 <http://www.yourdiseaserisk.wustl.edu/YDRDefault.aspx?ScreenControl=YDRGeneral&ScreenName=YDRHeart>

47 <http://www.yourdiseaserisk.wustl.edu/YDRDefault.aspx?ScreenControl=YDRGeneral&ScreenName=YDRStroke>

48 <http://www.zunis.org/Framingham%20Risk%20of%20CHD2.htm>

49 <https://ehealth.heartandstroke.ca/>

50 <https://healthyheartscore.sph.harvard.edu/>

51 <https://mhgpc.com/risk-calculator.html>

52 <https://myhealth.alberta.ca/Alberta/Pages/Heart-Disease-Risk-Calculator.aspx>

53 <https://qrisk.org/2015/>

54 <https://qrisk.org/2016/>

55 <https://qrisk.org/lifetime/>

56 <https://softwarecorp.es/asariskcalculator/public/calculator/en>

57 [https://www.acefitness.org/acefit/healthy\\_living\\_tools\\_content.aspx?id=10](https://www.acefitness.org/acefit/healthy_living_tools_content.aspx?id=10)

58 <https://www.cardiosmart.org/tools/heart-disease-risk-assessment>

59 <https://www.cvdriskchecksecure.com/framinghamriskscore.aspx>

60 <https://www.cvdriskchecksecure.com/ReynoldsRiskScore.aspx>

61 <https://www.dileyridgemedicalcenter.com/patient-information/health-information/heart-attack-risk-assessment>

62 <https://www.ghc.org/html/public/tools/heart/>

63 <https://www.med-decisions.com/h2hv2/>

<http://www.webcitation.org/6rB83owdW>

<http://www.webcitation.org/6rBE3hbO3>

<http://www.webcitation.org/6rBEBolwf>

<http://www.webcitation.org/6rB7BeOPk>

<http://www.webcitation.org/6rBEeKzcR>

<http://www.webcitation.org/6rB89RHQu>

<http://www.webcitation.org/6rB69ujJ>

<http://www.webcitation.org/6rB6GXNoV>

<http://www.webcitation.org/6rBEh5yOf>

<http://www.webcitation.org/6rBEI1Nsl>

<http://www.webcitation.org/6rBEpbUjd>

<http://www.webcitation.org/6rAwDbbCE>

<http://www.webcitation.org/6rB8PZtLD>

<http://www.webcitation.org/6rBF6Ua5G>

<http://www.webcitation.org/6rBF9V0gR>

<http://www.webcitation.org/6rBFDfOW>

<http://www.webcitation.org/6rBFGPEjw>

<http://www.webcitation.org/6rBFJzW8>

<http://www.webcitation.org/6rBFOhsvn>

<http://www.webcitation.org/6rBFSVabq>

<http://www.webcitation.org/6rBFWyfBN>

<http://www.webcitation.org/6rB8KPVQn>

<http://www.webcitation.org/6rBFa9Xa0>

<http://www.webcitation.org/6rBFdpUo2>

<http://www.webcitation.org/6rBFgBWEX>

<http://www.webcitation.org/6rBFJIZUn>

<http://www.webcitation.org/6rBFpIY1U>

<http://www.webcitation.org/6rBFtIo54>

<http://www.webcitation.org/6rBFxcX33>

<http://www.webcitation.org/6rBG2AL9H>

<http://www.webcitation.org/6rBG4Ovnd>

<http://www.webcitation.org/6rBG7PqDz>

<http://www.webcitation.org/6rBGEj6Vl>

<http://www.webcitation.org/6rBGRO6iB>

|    |                                                                                                                                                                                                                                                     |                                                                                         |
|----|-----------------------------------------------------------------------------------------------------------------------------------------------------------------------------------------------------------------------------------------------------|-----------------------------------------------------------------------------------------|
| 64 | <a href="https://www.mesa-nhlbi.org/MESACHDRisk/MesaRiskScore/RiskScore.aspx">https://www.mesa-nhlbi.org/MESACHDRisk/MesaRiskScore/RiskScore.aspx</a>                                                                                               | <a href="http://www.webcitation.org/6rB7Qdl0p">http://www.webcitation.org/6rB7Qdl0p</a> |
| 65 | <a href="https://www.mygoodhealth.ca/healthtools/health_tools.asp?t=17&amp;text_id=2704&amp;n=Heart+disease+risk+calculator">https://www.mygoodhealth.ca/healthtools/health_tools.asp?t=17&amp;text_id=2704&amp;n=Heart+disease+risk+calculator</a> | <a href="http://www.webcitation.org/6rBGXGFPf">http://www.webcitation.org/6rBGXGFPf</a> |
| 66 | <a href="https://www.nhs.uk/Tools/Pages/heartage.aspx">https://www.nhs.uk/Tools/Pages/heartage.aspx</a>                                                                                                                                             | <a href="http://www.webcitation.org/6rBGsY4MB">http://www.webcitation.org/6rBGsY4MB</a> |
| 67 | <a href="https://www.uptodate.com/contents/calculator-cardiovascular-risk-assessment-10-year-men-patient-education">https://www.uptodate.com/contents/calculator-cardiovascular-risk-assessment-10-year-men-patient-education</a>                   | <a href="http://www.webcitation.org/6rBGpAxFq">http://www.webcitation.org/6rBGpAxFq</a> |

Table B. PEMAT-P Understandability and Actionability Scores

| ID | Web address                                                                                                                                                                                                                                                               | Understandability | Actionability |
|----|---------------------------------------------------------------------------------------------------------------------------------------------------------------------------------------------------------------------------------------------------------------------------|-------------------|---------------|
| 1  | <a href="http://aricnews.net/riskcalc/html/rc1.html">http://aricnews.net/riskcalc/html/rc1.html</a>                                                                                                                                                                       | 55%               | 0%            |
| 2  | <a href="http://chd.bestsciencemedicine.com/calc2.html">http://chd.bestsciencemedicine.com/calc2.html</a>                                                                                                                                                                 | 62%               | 0%            |
| 3  | <a href="http://clincalc.com/cardiology/ascvd/pooledcohort.aspx">http://clincalc.com/cardiology/ascvd/pooledcohort.aspx</a>                                                                                                                                               | 69%               | 17%           |
| 4  | <a href="http://cvrisk.mvm.ed.ac.uk/calculator/calc.asp">http://cvrisk.mvm.ed.ac.uk/calculator/calc.asp</a>                                                                                                                                                               | 33%               | 0%            |
| 5  | <a href="http://healthtools.bodyandhealth.canada.com/health_tools.asp?t=82&amp;text_id=4720&amp;channel_id=2172&amp;relation_id=112942">http://healthtools.bodyandhealth.canada.com/health_tools.asp?t=82&amp;text_id=4720&amp;channel_id=2172&amp;relation_id=112942</a> | 80%               | 20%           |
| 6  | <a href="http://patient.info/doctor/cardiovascular-risk-calculator">http://patient.info/doctor/cardiovascular-risk-calculator</a>                                                                                                                                         | 40%               | 0%            |
| 7  | <a href="http://reference.medscape.com/calculator/aac-aha-cardiovascular-risk-ascvd">http://reference.medscape.com/calculator/aac-aha-cardiovascular-risk-ascvd</a>                                                                                                       | 30%               | 0%            |
| 8  | <a href="http://reference.medscape.com/calculator/framingham-cardiovascular-disease-risk">http://reference.medscape.com/calculator/framingham-cardiovascular-disease-risk</a>                                                                                             | 50%               | 0%            |
| 9  | <a href="http://reference.medscape.com/calculator/framingham-coronary-risk-cholesterol">http://reference.medscape.com/calculator/framingham-coronary-risk-cholesterol</a>                                                                                                 | 40%               | 0%            |
| 10 | <a href="http://statindecisionaid.mayoclinic.org/index.php/statin/index">http://statindecisionaid.mayoclinic.org/index.php/statin/index</a>                                                                                                                               | 77%               | 50%           |
| 11 | <a href="http://stroke.ucla.edu/stroke-risk-calculator">http://stroke.ucla.edu/stroke-risk-calculator</a>                                                                                                                                                                 | 50%               | 0%            |
| 12 | <a href="http://strongheart.ouhsc.edu/CHDcalculator/calculator.html">http://strongheart.ouhsc.edu/CHDcalculator/calculator.html</a>                                                                                                                                       | 50%               | 0%            |
| 13 | <a href="http://tools.acc.org/ASCVD-Risk-Estimator/">http://tools.acc.org/ASCVD-Risk-Estimator/</a>                                                                                                                                                                       | 60%               | 20%           |
| 14 | <a href="http://tools.bigbeelabs.com/aha/tools/hbp/">http://tools.bigbeelabs.com/aha/tools/hbp/</a>                                                                                                                                                                       | 100%              | 33%           |
| 15 | <a href="http://www.assign-score.com/estimate-the-risk/">http://www.assign-score.com/estimate-the-risk/</a>                                                                                                                                                               | 40%               | 0%            |
| 16 | <a href="http://www.bhgp.co.uk/cardiocalc.asp">http://www.bhgp.co.uk/cardiocalc.asp</a>                                                                                                                                                                                   | 75%               | 80%           |
| 17 | <a href="http://www.bsph.edu/Files/Baptist/Flash/StrokeRiskCalculator/index.htm">http://www.bsph.edu/Files/Baptist/Flash/StrokeRiskCalculator/index.htm</a>                                                                                                               | 80%               | 0%            |
| 18 | <a href="http://www.cdc.gov/vitalsigns/cardiovascular-disease/heartage.html">http://www.cdc.gov/vitalsigns/cardiovascular-disease/heartage.html</a>                                                                                                                       | 50%               | 0%            |
| 19 | <a href="http://www.cimedicalcenter.com/heart-attack-calculator-p126">http://www.cimedicalcenter.com/heart-attack-calculator-p126</a>                                                                                                                                     | 62%               | 0%            |
| 20 | <a href="http://www.cvdcheck.org.au/">http://www.cvdcheck.org.au/</a>                                                                                                                                                                                                     | 85%               | 40%           |
| 21 | <a href="http://www.cvriskcalculator.com/">http://www.cvriskcalculator.com/</a>                                                                                                                                                                                           | 50%               | 60%           |
| 22 | <a href="http://www.framinghamheartstudy.org/risk-functions/cardiovascular-disease/10-year-risk.php#">http://www.framinghamheartstudy.org/risk-functions/cardiovascular-disease/10-year-risk.php#</a>                                                                     | 40%               | 0%            |
| 23 | <a href="http://www.framinghamheartstudy.org/risk-functions/cardiovascular-disease/30-year-risk.php#">http://www.framinghamheartstudy.org/risk-functions/cardiovascular-disease/30-year-risk.php#</a>                                                                     | 40%               | 0%            |
| 24 | <a href="http://www.globalrph.com/pooled.htm">http://www.globalrph.com/pooled.htm</a>                                                                                                                                                                                     | 50%               | 0%            |
| 25 | <a href="http://www.heart.org/gglRisk/locale/en_US/index.html?gtype=health">http://www.heart.org/gglRisk/locale/en_US/index.html?gtype=health</a>                                                                                                                         | 88%               | 80%           |
| 26 | <a href="http://www.knowyournumbers.co.nz/heart-age-forecast.aspx">http://www.knowyournumbers.co.nz/heart-age-forecast.aspx</a>                                                                                                                                           | 77%               | 33%           |

|    |                                                                                                                                                                                                                                               |     |     |
|----|-----------------------------------------------------------------------------------------------------------------------------------------------------------------------------------------------------------------------------------------------|-----|-----|
| 27 | <a href="http://www.mayoclinic.org/heart-disease-risk/itt-20084942">http://www.mayoclinic.org/heart-disease-risk/itt-20084942</a>                                                                                                             | 90% | 60% |
| 28 | <a href="http://www.mcw.edu/calculators/Coronary-Heart-Disease-Risk.htm">http://www.mcw.edu/calculators/Coronary-Heart-Disease-Risk.htm</a>                                                                                                   | 40% | 0%  |
| 29 | <a href="http://www.mcw.edu/calculators/LDL-Cholesterol-Goal-Level.htm">http://www.mcw.edu/calculators/LDL-Cholesterol-Goal-Level.htm</a>                                                                                                     | 30% | 0%  |
| 30 | <a href="http://www.mdcalc.com/framingham-coronary-heart-disease-risk-score/">http://www.mdcalc.com/framingham-coronary-heart-disease-risk-score/</a>                                                                                         | 50% | 0%  |
| 31 | <a href="http://www.medcalc.com/heartrisk.html">http://www.medcalc.com/heartrisk.html</a>                                                                                                                                                     | 40% | 0%  |
| 32 | <a href="http://www.medindia.net/patients/calculators/cardiacrisk.asp">http://www.medindia.net/patients/calculators/cardiacrisk.asp</a>                                                                                                       | 70% | 60% |
| 33 | <a href="http://www.medindia.net/patients/calculators/stroke-risk-calculator.asp">http://www.medindia.net/patients/calculators/stroke-risk-calculator.asp</a>                                                                                 | 90% | 60% |
| 34 | <a href="http://www.mountcarmelhealth.com/fast">http://www.mountcarmelhealth.com/fast</a>                                                                                                                                                     | 80% | 0%  |
| 35 | <a href="http://www.mydr.com.au/tools/heart-disease-risk-test">http://www.mydr.com.au/tools/heart-disease-risk-test</a>                                                                                                                       | 50% | 0%  |
| 36 | <a href="http://www.mydr.com.au/tools/stroke-risk-test">http://www.mydr.com.au/tools/stroke-risk-test</a>                                                                                                                                     | 80% | 20% |
| 37 | <a href="http://www.ohsu.edu/xd/health/services/brain/getting-treatment/diagnosis/stroke/stroke-risk-assessment-test.cfm">http://www.ohsu.edu/xd/health/services/brain/getting-treatment/diagnosis/stroke/stroke-risk-assessment-test.cfm</a> | 80% | 20% |
| 38 | <a href="http://www.premierhealth.com/Your-Wellness/Live-Well-Stay-Well/Know-Your-Risk/Heart-Risk-Assessment/">http://www.premierhealth.com/Your-Wellness/Live-Well-Stay-Well/Know-Your-Risk/Heart-Risk-Assessment/</a>                       | 78% | 40% |
| 39 | <a href="http://www.projectbiglife.ca/life/index.php?le=1&amp;fhc=0&amp;str=1">http://www.projectbiglife.ca/life/index.php?le=1&amp;fhc=0&amp;str=1</a>                                                                                       | 70% | 0%  |
| 40 | <a href="http://www.qintervention.org/">http://www.qintervention.org/</a>                                                                                                                                                                     | 69% | 40% |
| 41 | <a href="http://www.qstroke.org/">http://www.qstroke.org/</a>                                                                                                                                                                                 | 69% | 0%  |
| 42 | <a href="http://www.reynoldsriskscore.org/">http://www.reynoldsriskscore.org/</a>                                                                                                                                                             | 62% | 0%  |
| 43 | <a href="http://www.riskscore.org.uk/">http://www.riskscore.org.uk/</a>                                                                                                                                                                       | 62% | 0%  |
| 44 | <a href="http://www.vizhealth.org/using/calculator/">http://www.vizhealth.org/using/calculator/</a>                                                                                                                                           | 85% | 40% |
| 45 | <a href="http://www.womensheart.org/content/heartdisease/heart_disease_risk_quiz.asp">http://www.womensheart.org/content/heartdisease/heart_disease_risk_quiz.asp</a>                                                                         | 67% | 40% |
| 46 | <a href="http://www.yourdiseaserisk.wustl.edu/YDRDefault.aspx?ScreenControl=YDRGeneral&amp;ScreenName=YDRHeart">http://www.yourdiseaserisk.wustl.edu/YDRDefault.aspx?ScreenControl=YDRGeneral&amp;ScreenName=YDRHeart</a>                     | 93% | 50% |
| 47 | <a href="http://www.yourdiseaserisk.wustl.edu/YDRDefault.aspx?ScreenControl=YDRGeneral&amp;ScreenName=YDRStroke">http://www.yourdiseaserisk.wustl.edu/YDRDefault.aspx?ScreenControl=YDRGeneral&amp;ScreenName=YDRStroke</a>                   | 93% | 33% |
| 48 | <a href="http://www.zunis.org/Framingham%20Risk%20of%20CHD2.htm">http://www.zunis.org/Framingham%20Risk%20of%20CHD2.htm</a>                                                                                                                   | 50% | 0%  |
| 49 | <a href="https://ehealth.heartandstroke.ca/">https://ehealth.heartandstroke.ca/</a>                                                                                                                                                           | 92% | 40% |
| 50 | <a href="https://healthyheartscore.sph.harvard.edu/">https://healthyheartscore.sph.harvard.edu/</a>                                                                                                                                           | 91% | 80% |
| 51 | <a href="https://mhgpc.com/risk-calculator.html">https://mhgpc.com/risk-calculator.html</a>                                                                                                                                                   | 50% | 0%  |
| 52 | <a href="https://myhealth.alberta.ca/Alberta/Pages/Heart-Disease-Risk-Calculator.aspx">https://myhealth.alberta.ca/Alberta/Pages/Heart-Disease-Risk-Calculator.aspx</a>                                                                       | 85% | 0%  |
| 53 | <a href="https://qrisk.org/2015/">https://qrisk.org/2015/</a>                                                                                                                                                                                 | 85% | 17% |
| 54 | <a href="https://qrisk.org/2016/">https://qrisk.org/2016/</a>                                                                                                                                                                                 | 85% | 17% |
| 55 | <a href="https://qrisk.org/lifetime/">https://qrisk.org/lifetime/</a>                                                                                                                                                                         | 62% | 17% |
| 56 | <a href="https://softwarecorp.es/asariskcalculator/public/calculator/en">https://softwarecorp.es/asariskcalculator/public/calculator/en</a>                                                                                                   | 33% | 20% |
| 57 | <a href="https://www.acefitness.org/acefit/healthy_living_tools_content.aspx?id=10">https://www.acefitness.org/acefit/healthy_living_tools_content.aspx?id=10</a>                                                                             | 92% | 0%  |
| 58 | <a href="https://www.cardiosmart.org/tools/heart-disease-risk-assessment">https://www.cardiosmart.org/tools/heart-disease-risk-assessment</a>                                                                                                 | 60% | 40% |
| 59 | <a href="https://www.cvdriskchecksecure.com/framinghamriskscore.aspx">https://www.cvdriskchecksecure.com/framinghamriskscore.aspx</a>                                                                                                         | 40% | 20% |
| 60 | <a href="https://www.cvdriskchecksecure.com/ReynoldsRiskScore.aspx">https://www.cvdriskchecksecure.com/ReynoldsRiskScore.aspx</a>                                                                                                             | 50% | 0%  |

|    |                                                                                                                                                                                                                                                     |     |      |
|----|-----------------------------------------------------------------------------------------------------------------------------------------------------------------------------------------------------------------------------------------------------|-----|------|
| 61 | <a href="https://www.dileyridgemedicalcenter.com/patient-information/health-information/heart-attack-risk-assessment">https://www.dileyridgemedicalcenter.com/patient-information/health-information/heart-attack-risk-assessment</a>               | 78% | 0%   |
| 62 | <a href="https://www.ghc.org/html/public/tools/heart/">https://www.ghc.org/html/public/tools/heart/</a>                                                                                                                                             | 82% | 60%  |
| 63 | <a href="https://www.med-decisions.com/h2hv2/">https://www.med-decisions.com/h2hv2/</a>                                                                                                                                                             | 71% | 0%   |
| 64 | <a href="https://www.mesa-nhlbi.org/MESACHDRisk/MesaRiskScore/RiskScore.aspx">https://www.mesa-nhlbi.org/MESACHDRisk/MesaRiskScore/RiskScore.aspx</a>                                                                                               | 30% | 0%   |
| 65 | <a href="https://www.mygoodhealth.ca/healthtools/health_tools.asp?t=17&amp;text_id=2704&amp;n=Heart+disease+risk+calculator">https://www.mygoodhealth.ca/healthtools/health_tools.asp?t=17&amp;text_id=2704&amp;n=Heart+disease+risk+calculator</a> | 80% | 0%   |
| 66 | <a href="https://www.nhs.uk/Tools/Pages/heartage.aspx">https://www.nhs.uk/Tools/Pages/heartage.aspx</a>                                                                                                                                             | 94% | 100% |
| 67 | <a href="https://www.uptodate.com/contents/calculator-cardiovascular-risk-assessment-10-year-men-patient-education">https://www.uptodate.com/contents/calculator-cardiovascular-risk-assessment-10-year-men-patient-education</a>                   | 60% | 0%   |

---

Table C. Inter-rater agreement between two raters for each PEMAT-P Item

| PEMAT-P item                                                                                                                          | Inter-rater agreement (%) | Cohen's Kappa   |
|---------------------------------------------------------------------------------------------------------------------------------------|---------------------------|-----------------|
| <b>Understandability</b>                                                                                                              |                           |                 |
| <i>Content</i>                                                                                                                        |                           |                 |
| 1. The material makes its purpose completely evident                                                                                  | 55                        | .08             |
| 2. The material does not include information or content that distracts from its purpose                                               | 93                        | -.05            |
| <i>Word Choice and Style</i>                                                                                                          |                           |                 |
| 3. The material uses common, everyday language                                                                                        | 72                        | .38             |
| 4. Medical terms are used only to familiarize audience with terms. When used, medical terms are defined                               | 75                        | .48             |
| 5. The material uses the active voice                                                                                                 | 55                        | .20             |
| <i>Use of Numbers</i>                                                                                                                 |                           |                 |
| 6. Numbers appearing in the material are clear and easy to understand                                                                 | 60                        | .37             |
| 7. The material does not expect the user to perform calculations                                                                      | 96                        | -.01            |
| <i>Organisation</i>                                                                                                                   |                           |                 |
| 8. The material breaks of "chunks" information into short sections                                                                    | 84                        | .18             |
| 9. The material's sections have informative headers                                                                                   | 84                        | .16             |
| 10. The material presents information in a logical sequence                                                                           | 82                        | -.04            |
| 11. The material provides a summary                                                                                                   | 42                        | .05             |
| <i>Layout and Design</i>                                                                                                              |                           |                 |
| 12. The material uses visual cues (e.g. arrows, boxes, bullets, bold, larger font, highlighting) to draw attention to key points      | 75                        | .42             |
| <i>Use of Visual Aids</i>                                                                                                             |                           |                 |
| 15. The material uses visual aids whenever they could make content more easily understood (e.g. illustration of healthy portion size) | 62                        | .17             |
| 16. The material's visual aids reinforce rather than distract from the content                                                        | 73                        | .47             |
| 17. The material's visual aids have clear titles or captions                                                                          | 67                        | .39             |
| 18. The material uses illustration and photographs that are clear and uncluttered                                                     | 76                        | .55             |
| 19. The material uses simple tables with short and clear row and column headings                                                      | 64                        | .01             |
| <b>Actionability</b>                                                                                                                  |                           |                 |
| 20. The material clearly identified at least one action the user can take                                                             | 81                        | .65             |
| 21. The material addresses the user directly when describing actions                                                                  | 81                        | .60             |
| 22. The material breaks down any action into manageable, explicit steps                                                               | 88                        | .57             |
| 23. The material provides a tangible tool (e.g. menu planners, checklists) whenever it could help the use take action                 | 99                        | .65             |
| 24. The material provides simple instructions or examples of how to perform calculations                                              | 99                        | -. <sup>a</sup> |
| 25. The material explains how to use the charts, graphs, tables, or diagrams to take actions                                          | 82                        | -. <sup>a</sup> |
| 26. The material uses visual aids whenever they could make it easier to act on the instructions                                       | 93                        | .27             |

<sup>a</sup>Unable to calculate as one rater had no variability
